# Supplementary material for: Effects of ambient gas on cold atmospheric plasma discharge in the decomposition of trifluoromethane
Source: Royal Society of Chemistry journal article supplement (doi:10.1039/c6ra01485b), 2016-01-01
Supplement: c6ra01485b1.pdf [file c6ra01485b1.pdf]

## Electronic Supplementary Information:

### Effects of Ambient Gas on Cold Atmospheric Plasma Discharge in the Decomposition of Trifluoromethane

Duc Ba Nguyen<sup>a</sup> and Won Gyu Lee<sup>a†</sup>

a) Department of Chemical Engineering, Kangwon National University,  
Chuncheon, Kangwon, 24341, Republic of Korea

†) W. G. Lee. E-mail: wglee@kangwon.ac.kr

#### S1. Record and measure of electrical power by an oscilloscope (Tektronix TDS2012B, 2 channels)

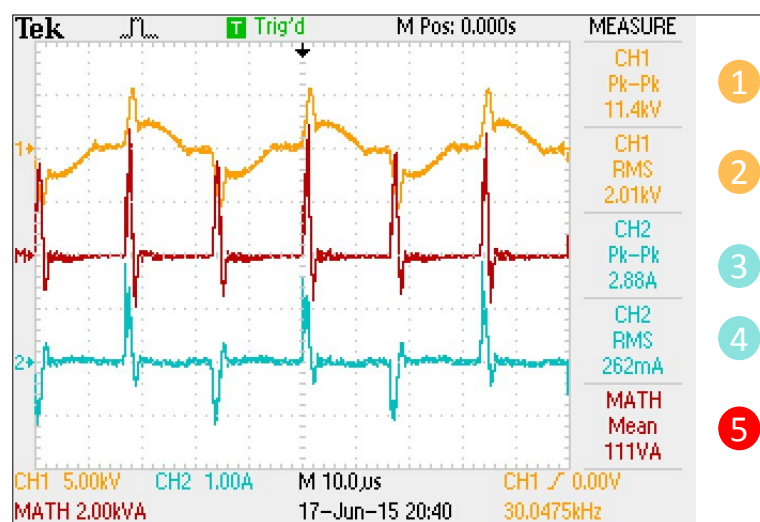

**Fig. S1.** Electrical waveforms of AC pulse power supplied and five parameter measurements: 1= applied voltage waveform, 2= total current waveform, M= active power, M1= peak to peak of voltage, M2= root mean square of applied voltage, M3= peak to peak of current, M4= root mean square of total current, M5= mean of active power (applied voltage = 6.0 kVp; frequency = 30 kHz total; flow rate = 1000 ml/min; CHF<sub>3</sub>/O<sub>2</sub>/N<sub>2</sub>= 2/10/988 ml/min).

**S2. Comparison of the phase angle between voltage and current for Ar and He as dilution gases**

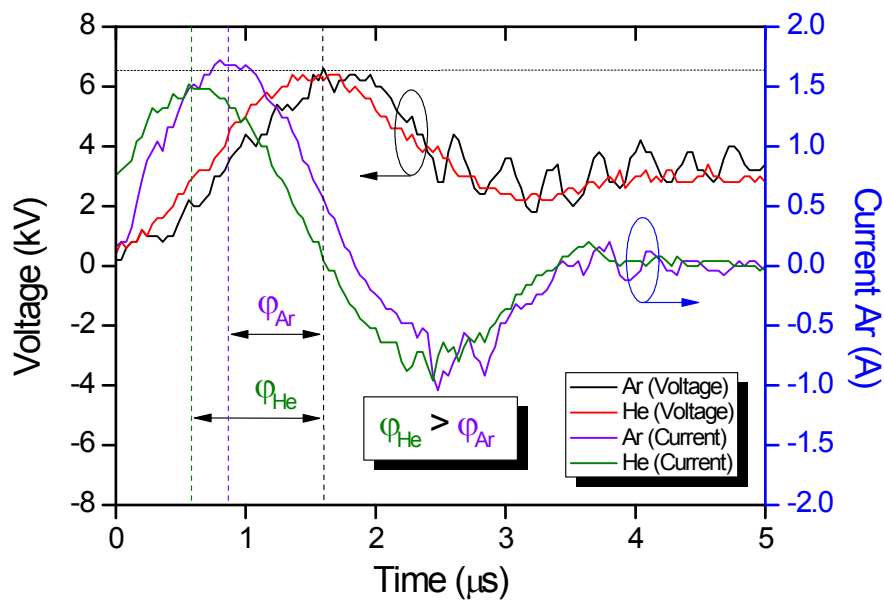

**Fig. S2.** Diagram of the phase angles between voltage and current for Ar and He as dilution gases (flow rate of  $\text{CHF}_3$ ,  $\text{O}_2$  and total flow rate 2, 10 and 1000 ml/min, respectively; frequency= 30 kHz; applied voltage= 6.5 kVp).

### **S3. Identification of spectra of plasma discharges with the changing composition of the feed gas**

Although there was an absence of N<sub>2</sub> in the feed gases with Ar or He dilution, these spectra present N<sub>2</sub> lines in the second positive system (C<sup>3</sup>Π<sub>u</sub> → B<sup>3</sup>Π<sub>g</sub>). A possible explanation for this might be that there was an N<sub>2</sub> contaminant in our plasma system under these conditions. This phenomenon also presented in the previous reports.<sup>1,2</sup>

All spectra have a high intensity of the emission line of gas dilution:

Ar dilution gas: from 680 to 1000 nm (Ar I)

He dilution gas: from 380 to 850 nm (He I)

N<sub>2</sub> dilution gas: from 300 to 500 nm (second positive system, C<sup>3</sup>Π<sub>u</sub> → B<sup>3</sup>Π<sub>g</sub>)

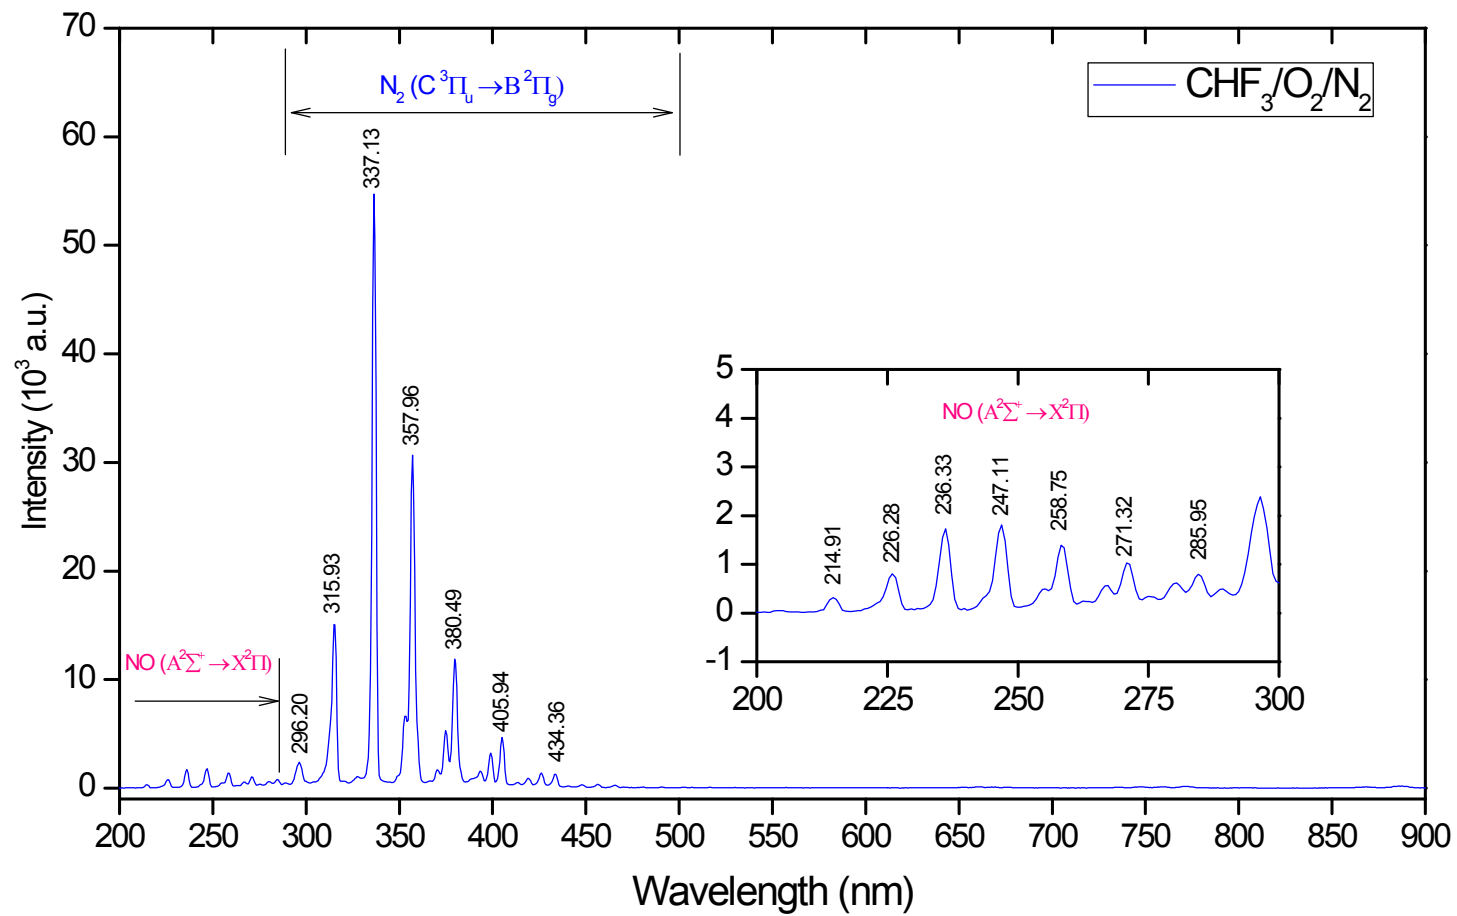

**Fig. S3.** Emission spectrum of CHF<sub>3</sub>/O<sub>2</sub>/N<sub>2</sub> plasma in a dielectric barrier discharge at atmospheric pressure (flow rate of CHF<sub>3</sub>/O<sub>2</sub>/N<sub>2</sub> = 2/10/988 ml/min; frequency= 30 kHz; active power= 60 W).

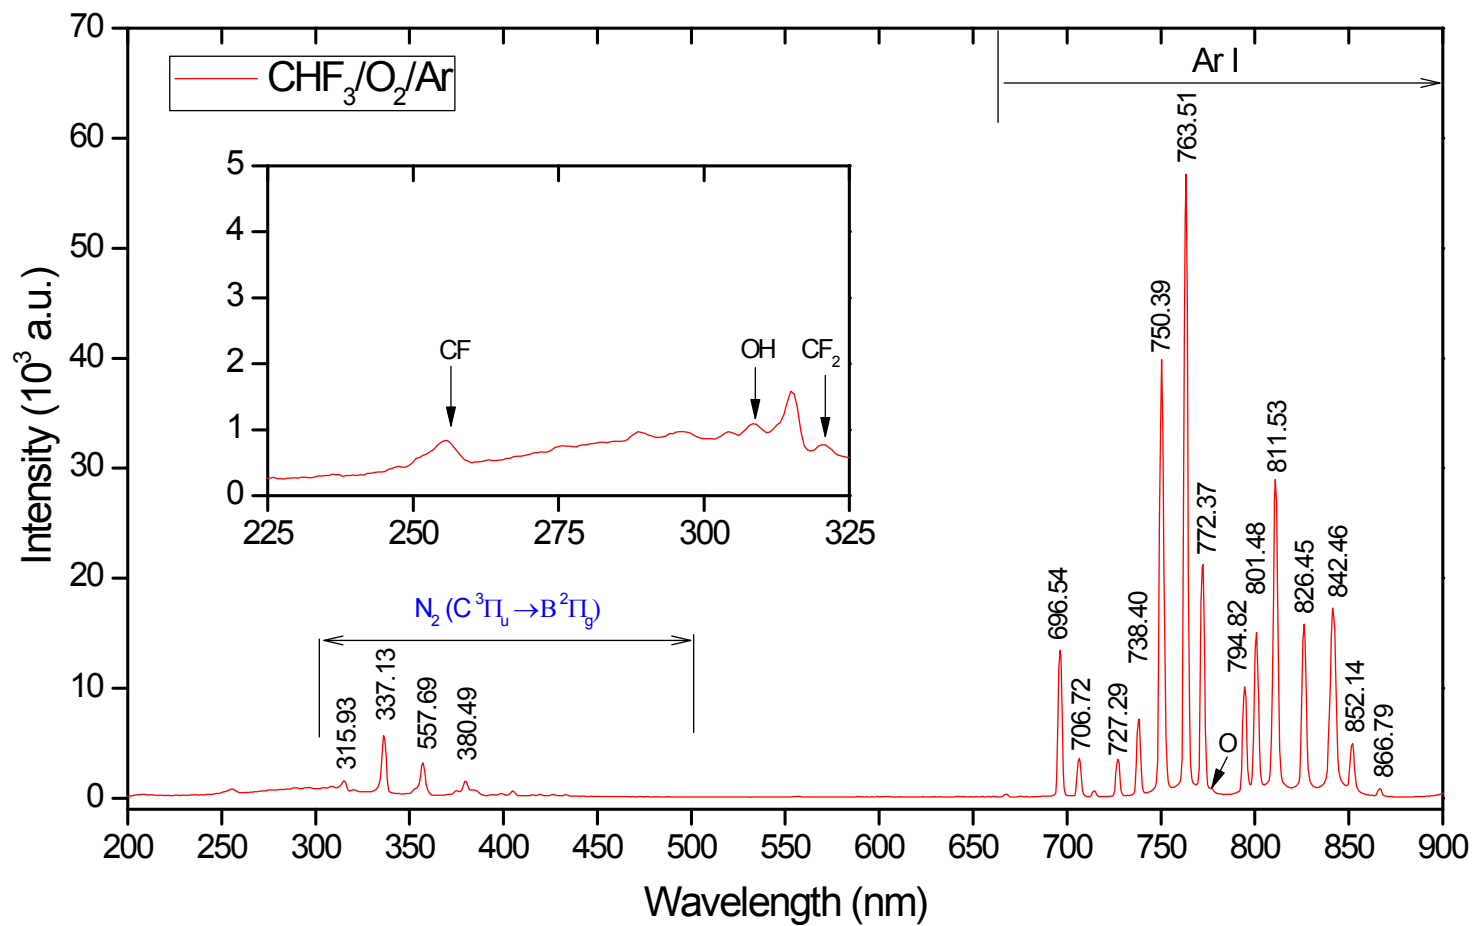

**Fig. S4.** Emission spectrum of CHF<sub>3</sub>/O<sub>2</sub>/Ar plasma in a dielectric barrier discharge at atmospheric pressure (flow rate of CHF<sub>3</sub>/O<sub>2</sub>/Ar = 2/10/988 ml/min; frequency= 30 kHz; active power= 60 W).

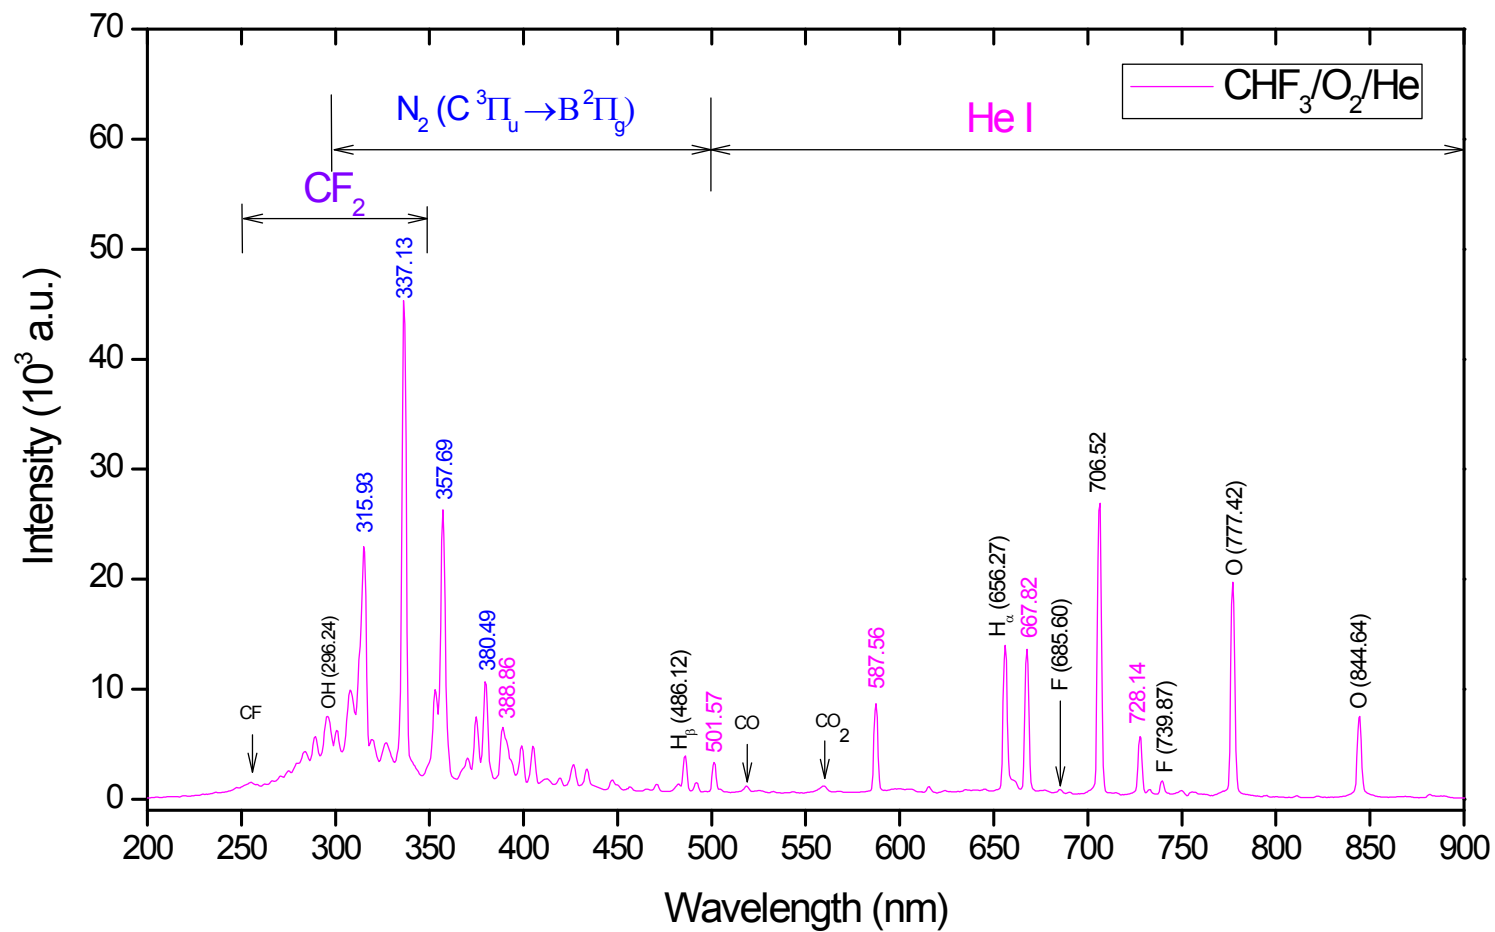

**Fig. S5.** Emission spectrum of CHF<sub>3</sub>/O<sub>2</sub>/He plasma in a dielectric barrier discharge at atmospheric pressure (flow rate of CHF<sub>3</sub>/O<sub>2</sub>/He = 2/10/988 ml/min; frequency= 30 kHz; active power= 60 W).

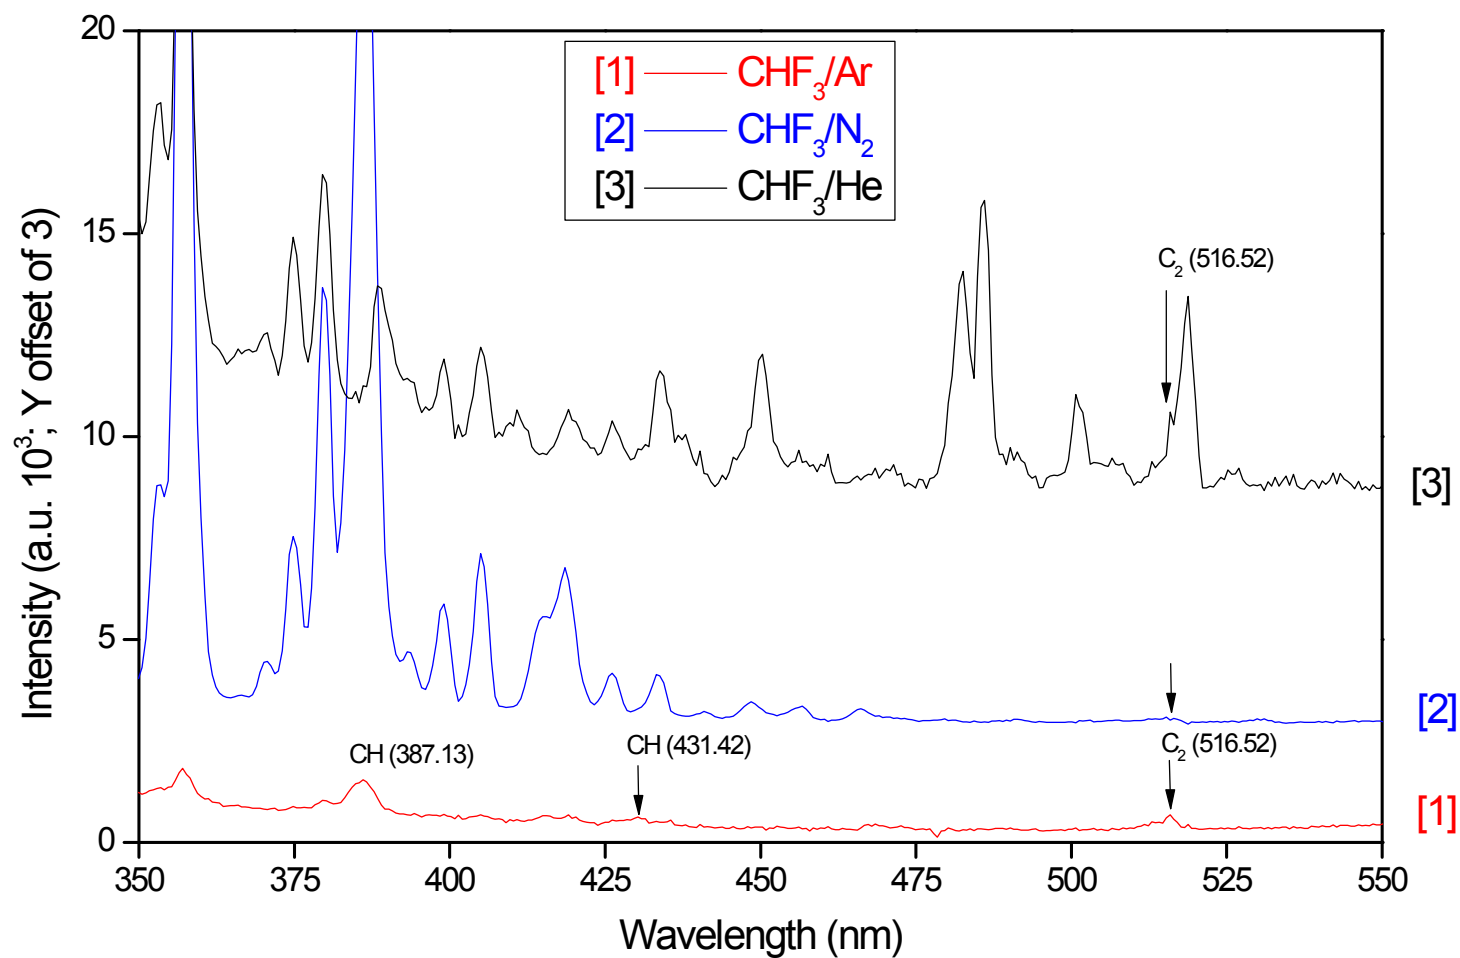

**Fig. S6.** Emission spectrum of CHF<sub>3</sub>/X plasma in a dielectric barrier discharge at atmospheric pressure (flow rate of CHF<sub>3</sub>/X = 8/988 ml/min, X stands for Ar, He or N<sub>2</sub>; frequency= 30 kHz; active power= 60 W).

#### **S4. Possible chemical reactions for the CHF<sub>3</sub> decompositions in the atmospheric plasma**

Possible chemical reactions in plasma discharge were categorized into several groups by the reactants, as shown below. In each group of reactants, the kinetics of the chemical reactions are flowing largest to smallest at a temperature around 300 K. However, several rate constants of chemical reaction were recorded at high temperature because we did not find the rate constant of chemical reaction at the low temperature in the chemical kinetics database.<sup>3</sup>

The electron-impact reaction dissociated radicals or gas molecules. The kinetics of these reactions depended on electron energy. This can be described by an electron-impact cross section ( $\sigma$ ).<sup>4, 5</sup> The kinetics of the reaction between excited species (M) with radicals and gases molecules also depend on the energy of the excited species.



| Chemical Reaction                                                            | Rate Constant                      |          | Ref. |
|------------------------------------------------------------------------------|------------------------------------|----------|------|
|                                                                              | k<br>(cm <sup>3</sup> /molecule s) | T<br>(K) |      |
| <b>CHF<sub>3</sub> Reactant</b>                                              |                                    |          |      |
| CHF <sub>3</sub> + e/M → Products                                            | $\sigma$ (*)                       |          | 5    |
| CHF <sub>3</sub> + ·F → ·CF <sub>3</sub> + HF                                | 1.56E-13                           | 300      | 6    |
| CHF <sub>3</sub> + CF <sub>3</sub> O → CF <sub>3</sub> OH + ·CF <sub>3</sub> | 5.99E-16                           | 296      | 7    |
| CHF <sub>3</sub> + ·OH → ·CF <sub>3</sub> + H <sub>2</sub> O                 | 3.06E-16                           | 300      | 8    |
| CHF <sub>3</sub> + H· → H <sub>2</sub> + ·CF <sub>3</sub>                    | 7.36E-19                           | 300      | 9    |
| CHF <sub>3</sub> → ·CF <sub>2</sub> + HF                                     | 1.70E-19                           | 1150     | 10   |
| CHF <sub>3</sub> + O· → ·CF <sub>3</sub> + ·OH                               | 9.89E-20                           | 298      | 11   |
| CHF <sub>3</sub> + ·CF <sub>2</sub> → ·CF <sub>3</sub> + ·CHF <sub>2</sub>   | 4.62E-21                           | 973      | 12   |
| CHF <sub>3</sub> + H· → ·CHF <sub>2</sub> + HF                               | 4.26E-40                           | 300      | 13   |
| CHF <sub>3</sub> + H· → CH <sub>2</sub> F <sub>2</sub> + ·F                  | 8.49E-58                           | 300      | 13   |
| <b>·CF<sub>3</sub> Reactant</b>                                              |                                    |          |      |
| ·CF <sub>3</sub> + e/M → Products                                            | $\sigma$                           |          | 5    |
| ·CF <sub>3</sub> + ·CHF <sub>2</sub> → CHF <sub>3</sub> + ·CF <sub>2</sub>   | 8.79E-02                           | 300      | 14   |
| ·CF <sub>3</sub> + O· → COF <sub>2</sub> + ·F                                | 3.32E-11                           | 298      | 15   |
| ·CF <sub>3</sub> + NO → CF <sub>3</sub> NO                                   | 2.01E-11                           | 253-373  | 16   |
| ·CF <sub>3</sub> + H· → ·CF <sub>2</sub> + HF                                | 9.10E-11                           | 298      | 17   |
| ·CF <sub>3</sub> + ·OH → COF <sub>2</sub> + HF                               | 2.61E-11                           | 300      | 8    |
| ·CF <sub>3</sub> + NO <sub>2</sub> → NO + CF <sub>3</sub> O                  | 2.51E-11                           | 300      | 18   |
| ·CF <sub>3</sub> + N → Other Products + ·F                                   | 1.79E-11                           | 293      | 19   |
| ·CF <sub>3</sub> + NO <sub>2</sub> → COF <sub>2</sub> + FNO                  | 1.53E-11                           | 298      | 20   |
| ·CF <sub>3</sub> + ·CF <sub>3</sub> → C <sub>2</sub> F <sub>6</sub>          | 1.30E-11                           | 300      | 21   |
| ·CF <sub>3</sub> + FCO → CF <sub>3</sub> COF                                 | 6.91E-12                           | 298      | 22   |
| ·CF <sub>3</sub> + ·CF <sub>2</sub> → C <sub>2</sub> F <sub>5</sub>          | 6.42E-12                           | 940      | 23   |
| ·CF <sub>3</sub> + ·CF <sub>3</sub> → Products                               | 1.80E-12                           | 290      | 24   |
| ·CF <sub>3</sub> + O <sub>3</sub> → O <sub>2</sub> + CF <sub>3</sub> O       | 9.30E-13                           | 298      | 25   |
| ·CF <sub>3</sub> + F <sub>2</sub> → CF <sub>4</sub> + ·F                     | 6.60E-14                           | 300      | 26   |
| ·CF <sub>3</sub> + O <sub>2</sub> → O· + CF <sub>3</sub> O                   | 2.93E-17                           | 700      | 27   |
| ·CF <sub>3</sub> → ·CF <sub>2</sub> + ·F                                     | 1.91E-17                           | 1600     | 28   |
| ·CF <sub>3</sub> + H <sub>2</sub> → CHF <sub>3</sub> + H·                    | 1.73E-18                           | 350      | 29   |
| ·CF <sub>3</sub> + N <sub>2</sub> O → N <sub>2</sub> + CF <sub>3</sub> O     | 2.78E-20                           | 589      | 30   |
| ·CF <sub>3</sub> + ·F → CF <sub>4</sub>                                      | 1.47E-28                           | 290      | 24   |

| Chemical Reaction                                                                            | Rate Constant                      |           | Ref. |
|----------------------------------------------------------------------------------------------|------------------------------------|-----------|------|
|                                                                                              | k<br>(cm <sup>3</sup> /molecule s) | T<br>(K)  |      |
| $\cdot\text{CF}_3 + \text{O}_2 \rightarrow \text{CF}_3\text{O}_2$ (n=3)                      | 2.93E-29                           | 300       | 31   |
| $\cdot\text{CF}_3 + \text{O}_2 + \text{M} \rightarrow \text{M} + \text{CF}_3\text{O}_2$      | 1.90E-29                           | 300       | 32   |
| $\cdot\text{CF}_3 + \text{O}\cdot \rightarrow \text{CF}_3\text{O}$                           |                                    |           | 33   |
| $\cdot\text{CF}_3 + \text{H}_2\text{O} \rightarrow \text{CHF}_3 + \cdot\text{OH}$            |                                    |           | 34   |
| <b><math>\cdot\text{CHF}_2</math> Reactant</b>                                               |                                    |           |      |
| $\cdot\text{CHF}_2 + \text{e}/\text{M} \rightarrow \text{Products}$                          | $\sigma$                           |           | 5    |
| $\cdot\text{CHF}_2 + \text{H}\cdot \rightarrow \text{HF} + \cdot\text{CHF}$                  | 1.25E+00                           | 298       | 35   |
| $\cdot\text{CHF}_2 + \cdot\text{CHF}_2 \rightarrow \text{CH}_2\text{F}_2 + \cdot\text{CF}_2$ | 1.30E-01                           | 300-400   | 36   |
| $\cdot\text{CHF}_2 + \text{H}\cdot \rightarrow \text{H}_2 + \cdot\text{CF}_2$                | 3.32E-11                           | 600-1400  | 37   |
| $\cdot\text{CHF}_2 + \text{O}\cdot \rightarrow \text{COF}_2 + \text{H}\cdot$                 | 1.66E-11                           | 600-700   | 37   |
| $\cdot\text{CHF}_2 + \text{H}_2 \rightarrow \text{CH}_2\text{F}_2 + \text{H}\cdot$           | 6.93E-20                           | 300       | 9    |
| $\text{CO} + \cdot\text{CHF}_2 \rightarrow \text{FC}\equiv\text{CF} + \cdot\text{OH}$        |                                    |           | 38   |
| $\text{CO} + \cdot\text{CHF}_2 \rightarrow \text{Products}$                                  |                                    |           | 38   |
| $\text{CO} + \cdot\text{CHF}_2 \rightarrow \text{CHF}_2\text{CO}$                            |                                    |           | 38   |
| $\text{CO} + \cdot\text{CHF}_2 \rightarrow \text{CFCFOH}$                                    |                                    |           | 38   |
| $\text{CO} + \cdot\text{CHF}_2 \rightarrow \text{CF}_2\text{CHO}$                            |                                    |           | 38   |
| $\text{CO} + \cdot\text{CHF}_2 \rightarrow \text{CF}_2\text{COH}$                            |                                    |           | 38   |
| <b><math>\cdot\text{CF}_2</math> Reactant</b>                                                |                                    |           |      |
| $\cdot\text{CF}_2 + \text{e}/\text{M} \rightarrow \text{Products}$                           | $\sigma$                           |           | 5    |
| $\cdot\text{CF}_2 + \cdot\text{OH} \rightarrow \text{Products}$                              | 4.98E-11                           | 1800      | 39   |
| $\cdot\text{CF}_2 + \cdot\text{F} \rightarrow \cdot\text{CF}_3$                              | 4.15E-11                           | 298       | 40   |
| $\cdot\text{CF}_2 + \text{O}\cdot \rightarrow \text{FCO} + \cdot\text{F}$                    | 4.07E-11                           | 2000-2430 | 41   |
| $\cdot\text{CF}_2 + \text{H}\cdot \rightarrow \text{CF} + \text{HF}$                         | 3.90E-11                           | 298       | 17   |
| $\cdot\text{CF}_2 + \text{H}\cdot \rightarrow \text{Products}$                               | 3.32E-11                           | 1800      | 39   |
| $\cdot\text{CF}_2 + \cdot\text{OH} \rightarrow \text{COF}_2 + \text{H}\cdot$                 | 2.06E-11                           | 300       | 42   |
| $\cdot\text{CF}_2 + \text{O}\cdot \rightarrow \text{Products}$                               | 1.66E-11                           | 298       | 15   |
| $\cdot\text{CF}_2 + \text{N} \rightarrow \text{Products}$                                    | 7.21E-12                           | 293       | 43   |
| $\cdot\text{CF}_2 + \cdot\text{CF}_2 \rightarrow \text{C}_2\text{F}_4$                       | 3.70E-14                           | 300       | 44   |
| $\cdot\text{CF}_2 + \text{NO} \rightarrow \text{CF}_2\text{NO}$                              | 1.52E-14                           | 1600      | 45   |
| $\cdot\text{CF}_2 + \text{NO}_2 \rightarrow \text{COF}_2 + \text{NO}$                        | 7.52E-15                           | 298       | 46   |
| $\cdot\text{CF}_2 + \text{O}_2 \rightarrow \text{Other Products} + \text{CO}$                | 6.42E-15                           | 1200      | 47   |
| $\cdot\text{CF}_2 + \text{F}_2 \rightarrow \cdot\text{CF}_3 + \cdot\text{F}$                 | 2.01E-15                           | 295       | 48   |

| Chemical Reaction                                                                        | Rate Constant                      |          | Ref. |
|------------------------------------------------------------------------------------------|------------------------------------|----------|------|
|                                                                                          | k<br>(cm <sup>3</sup> /molecule s) | T<br>(K) |      |
| $\cdot\text{CF}_2 + \text{N}_2\text{O} \rightarrow \text{Products}$                      | 8.30E-16                           | 298      | 46   |
| $\cdot\text{CF}_2 + \text{O}_2 \rightarrow \text{COF}_2 + \text{O}\cdot$                 | 4.72E-16                           | 1200     | 49   |
| $\cdot\text{CF}_2 + \text{O}_2 \rightarrow \text{Products}$                              | 8.30E-18                           | 803      | 50   |
| $\text{H}_2 + \cdot\text{CF}_2 \rightarrow \text{Products}$                              | 5.00E-19                           | 873      | 51   |
| $\cdot\text{CF}_2 + \text{O}_3 \rightarrow \text{Products}$                              | 1.39E-19                           | 300      | 50   |
| $\cdot\text{CF}_2 + \text{H}\cdot \rightarrow \cdot\text{CHF}_2$                         | 1.80E-21                           | 673      | 52   |
| $\text{H}_2 + \cdot\text{CF}_2 \rightarrow \text{CH}_2\text{F}_2$                        | 4.43E-23                           | 673      | 52   |
| <b>COF<sub>2</sub> Reactant</b>                                                          |                                    |          |      |
| $\text{COF}_2 + \text{H}\cdot \rightarrow \text{CHF}_2\text{O}(\cdot)$                   | 1.96E+00                           | 600      | 53   |
| $\text{O}(1\text{D}) + \text{COF}_2 \rightarrow \text{Products}$                         | 7.41E-11                           | 298      | 54   |
| $\text{O}(1\text{D}) + \text{COF}_2 \rightarrow \text{CO}_2 + \text{F}_2$                | 2.09E-11                           | 298      | 54   |
| $\text{COF}_2 + \text{CO} \rightarrow \text{FCO} + \text{FCO}$                           | 3.83E-14                           | 2200     | 55   |
| $\text{COF}_2 + \cdot\text{F} \rightarrow \text{CF}_3\text{O}$                           | 9.10E-16                           | 484      | 56   |
| $\text{COF}_2 + \cdot\text{F} \rightarrow \text{FCO} + \text{F}_2$                       | 2.66E-16                           | 2200     | 55   |
| $\text{COF}_2 \rightarrow \text{FCO} + \cdot\text{F}$                                    | 9.76E-17                           | 2600     | 57   |
| $\text{COF}_2 + \text{H}_2 \rightarrow \text{Products}$                                  | 1.31E-17                           | 1900     | 57   |
| $\text{COF}_2 + \cdot\text{OH} \rightarrow \text{HF} + \text{FC}(\text{O})\text{O}\cdot$ | 8.98E-22                           | 600      | 53   |
| $\text{COF}_2 + \text{H}\cdot \rightarrow \text{FCO} + \text{HF}$                        | 5.29E-25                           | 600      | 53   |
| $\text{COF}_2 + \text{H}_2\text{O} \rightarrow \text{HF} + \text{FC}(\text{O})\text{OH}$ | 4.33E-25                           | 600      | 53   |
| $\text{COF}_2 + \text{H}_2\text{O} \rightarrow \text{CF}_2(\text{OH})_2$                 | 1.20E-25                           | 600      | 53   |
| <b><math>\cdot\text{COF}</math> Reactant</b>                                             |                                    |          |      |
| $\cdot\text{COF} + e/\text{M} \rightarrow \text{Products}$                               | $\sigma$                           |          | 5    |
| $\text{FCO} + \text{O}\cdot \rightarrow \text{Products}$                                 | 9.96E-11                           | 300-2000 | 15   |
| $\text{FCO} + \text{H}\cdot \rightarrow \text{CO} + \text{HF}$                           | 4.15E-11                           | 600-1400 | 37   |
| $\text{FCO} + \text{FCO} \rightarrow \text{COF}_2 + \text{CO}$                           | 1.80E-11                           | 295      | 58   |
| $\text{FCO} + \cdot\text{F} \rightarrow \text{COF}_2$                                    | 5.00E-12                           | 298      | 59   |
| $\text{FCO} + \cdot\text{F} \rightarrow \text{CO} + \text{F}_2$                          | 4.52E-13                           | 2200     | 55   |
| $\text{FCO} + \text{F}_2 \rightarrow \text{COF}_2 + \cdot\text{F}$                       | 4.00E-14                           | 298      | 59   |
| $\text{FCO} \rightarrow \text{CO} + \cdot\text{F}$                                       | 5.98E-16                           | 951      | 60   |
| $\text{FCO} + \text{O}_2 \rightarrow \text{Products}$                                    | 4.00E-16                           | 800      | 60   |

| Chemical Reaction                | Rate Constant                      |          | Ref. |
|----------------------------------|------------------------------------|----------|------|
|                                  | k<br>(cm <sup>3</sup> /molecule s) | T<br>(K) |      |
| <b>·CHF Reactant</b>             |                                    |          |      |
| ·CHF + e/M → Products            | $\sigma$                           |          | 5    |
| ·CHF + O· → CO + HF              | 1.20E+00                           | 298      | 61   |
| H· + ·CHF → Products             | 4.90E-10                           | 293      | 62   |
| ·CHF + O· → Products             | 1.50E-10                           | 295      | 63   |
| ·CHF + N → Products              | 2.51E-11                           | 295      | 63   |
| NO + ·CHF → Products             | 7.04E-12                           | 293      | 64   |
| O <sub>2</sub> + ·CHF → Products | 5.00E-16                           | 295      | 63   |
| <b>CF Reactant</b>               |                                    |          |      |
| CF + e/M → Products              | $\sigma$                           |          | 5    |
| CF + NO <sub>2</sub> → Products  | 4.00E-11                           | 294      | 65   |
| CF + N → CN + ·F                 | 3.90E-11                           | 294      | 65   |
| CF + O· → CO + ·F                | 3.90E-11                           | 294      | 65   |
| CF + NO → Products               | 2.09E-11                           | 294      | 66   |
| CF + H· → C + HF                 | 1.91E-11                           | 298      | 17   |
| CF + O· → Products               | 1.20E-11                           | 293      | 43   |
| CF + F <sub>2</sub> → Products   | 4.37E-12                           | 300      | 67   |
| CF + N → Products                | 3.40E-12                           | 293      | 43   |
| CF + O <sub>2</sub> → Products   | 1.60E-12                           | 294      | 66   |
| CF + ·F → ·CF <sub>2</sub>       | 1.00E-13                           | 294      | 65   |
| H <sub>2</sub> + CF → Products   | 1.00E-14                           | 284      | 66   |
| CO <sub>2</sub> + CF → Products  | 1.00E-14                           | 284      | 66   |
| CF <sub>4</sub> + CF → Products  | 1.00E-14                           | 284      | 66   |
| CF + N <sub>2</sub> O → Products | 1.00E-14                           | 294      | 65   |
| CF + N <sub>2</sub> → Products   | 1.00E-14                           | 294      | 65   |
| CF + H· → ·CH + ·F               | 1.11E-24                           | 300      | 68   |
| CF + ·F → C + F <sub>2</sub>     | 8.12E-63                           | 300      | 68   |

| Chemical Reaction                                           | Rate Constant                      |          | Ref. |
|-------------------------------------------------------------|------------------------------------|----------|------|
|                                                             | k<br>(cm <sup>3</sup> /molecule s) | T<br>(K) |      |
| <b>CO<sub>2</sub> Reactant</b>                              |                                    |          |      |
| CO <sub>2</sub> + e/M → Products                            | $\sigma$                           |          | 5    |
| N( <sup>2</sup> D) + CO <sub>2</sub> → CO + NO              | 3.60E-13                           |          | 69   |
| N( <sup>2</sup> P) + CO <sub>2</sub> → Products             | 3.60E-13                           |          | 69   |
| CO <sub>2</sub> + NO → CO + NO <sub>2</sub>                 | 5.00E-15                           | 3000     | 70   |
| CO <sub>2</sub> + N → CO + NO                               | 1.07E-15                           | 300      | 71   |
| CO <sub>2</sub> → CO + O·                                   | 1.42E-18                           | 2620     | 72   |
| CO <sub>2</sub> + H· → CO + ·OH                             | 1.40E-29                           | 300      | 73   |
| CO <sub>2</sub> + O· → CO <sub>3</sub>                      | 1.22E-49                           | 300      | 73   |
| CO <sub>2</sub> + H <sub>2</sub> → CO + H <sub>2</sub> O    |                                    |          | 74   |
| <b>CO Reactant</b>                                          |                                    |          |      |
| CO + e/M → Products                                         | $\sigma$                           |          | 5    |
| O(1D) + CO → CO <sub>2</sub>                                | 8.00E-11                           | 100-2100 | 75   |
| CO + ·F → FCO                                               | 5.50E-13                           | 295      | 76   |
| CO + ·OH → Products                                         | 2.41E-13                           | 200-300  | 31   |
| CO + ·OH → CO <sub>2</sub> + H·                             | 1.49E-13                           | 298      | 77   |
| CO + CF <sub>3</sub> O → Products                           | 6.84E-14                           | 300      | 78   |
| CO + CF <sub>3</sub> O → COF <sub>2</sub> + FCO             | 2.01E-15                           | 298      | 78   |
| CO + O· → CO <sub>2</sub>                                   | 4.98E-16                           | 300      | 79   |
| CO + CF <sub>3</sub> O → CO <sub>2</sub> + ·CF <sub>3</sub> | 4.00E-16                           | 298      | 78   |
| CO + OF → CO <sub>2</sub> + ·F                              | 3.65E-17                           | 550      | 80   |
| CO + O <sub>3</sub> → Products                              | 1.00E-21                           | 298      | 81   |
| CO + F <sub>2</sub> → FCO + ·F                              | 3.11E-22                           | 273-315  | 82   |
| CO + O <sub>3</sub> → CO <sub>2</sub> + O <sub>2</sub>      | 4.00E-25                           | 296      | 83   |
| CO + H· → HCO (**)                                          | 1.54E-34                           | 300      | 84   |
| CO + NO <sub>2</sub> → CO <sub>2</sub> + NO                 | 3.63E-35                           | 300      | 85   |

(\*): the rate constant depends on the electron energy, and has been described by an electron-impact cross section ( $\sigma$ ).

(\*\*): The reaction order: 3; the unit of  $k(T)$  is cm<sup>6</sup>/molecule<sup>2</sup> s.

## References

1. H. Zhang, Z. Xu, J. Shen, X. Li, L. Ding, J. Ma, Y. Lan, W. Xia, C. Cheng, Q. Sun, Z. Zhang and P. K. Chu, *Scientific Reports*, 2015, **5**, 10031.
2. C.-C. Weng, J.-D. Liao, H.-H. Chen, T.-Y. Lin and C.-L. Huang, *International Journal of Radiation Biology*, 2011, **87**, 936-943.
3. J. Manion, R. Huie, R. Levin, D. Burgess Jr, V. Orkin, W. Tsang, W. McGivern, J. Hudgens, V. Knyazev, D. Atkinson, E. Chai, A. Tereza, C. Lin, T. Allison, W. Mallard, F. Westley, J. Herron, R. F. Hampson and D. Frizzell, *NIST Chemical Kinetics Database, NIST Standard Reference Database 17, Version 7.0 (Web Version), Release 1.6. 8, Data version 2013.03, National Institute of Standards and Technology, Gaithersburg, Maryland, 20899-8320*, 2015.
4. L. G. Christophorou, J. K. Olthoff and M. V. V. S. Rao, *J. Phys. Chem. Ref. Data*, 1997, **26**, 1-15.
5. Y. Kim, K. Irikura, M. Rudd, M. Ali, P. Stone, J. Chang, J. Coursey, R. Dragoset, A. Kishore, K. Olsen, A. Sansonetti, G. Wiersma, D. Zucker and M. Zucker, *Electron-impact cross sections for ionization and excitation*, NIST Standard Reference Database 107, 2005.
6. F. Louis and J.-P. Sawerysyn, *J. Chem. Soc., Faraday Trans.*, 1998, **94**, 1437-1445.
7. T. J. Wallington and J. C. Ball, *J. Phys. Chem.*, 1995, **99**, 3201-3205.
8. N. K. Srinivasan, M. C. Su, J. V. Michael, S. J. Klippenstein and L. B. Harding, *J. Phys. Chem. A*, 2007, **111**, 6822-6831.
9. D. K. Maity, W. T. Duncan and T. N. Truong, *J. Phys. Chem. A*, 1999, **103**, 2152-2159.
10. Y. Hidaka, T. Nakamura and H. Kawano, *Chem. Phys. Lett.*, 1991, **187**, 40-44.

11. J. Jourdain, G. Poulet, J. Barassin, G. Le Bras and J. Combourieu, *Pollut. Atmos.*, **75**, 256-259.
12. H. Yu, E. M. Kennedy, J. C. Mackie and B. Z. Dlugogorski, *Environ. Sci. Technol.*, 2006, **40**, 5778-5785.
13. R. J. Berry, C. J. Ehlers, D. R. Burgess Jr, M. R. Zachariah and P. Marshall, *Chem. Phys. Lett.*, 1997, **269**, 107-116.
14. G. O. Pritchard, W. B. Nilsson, P. E. Marchant, L. C. Case, J. F. Parmer and R. F. Youngs, *Int. J. Chem. Kinet.*, 1984, **16**, 69-89.
15. J. T. Herron, *J. Phys. Chem. Ref. Data*, 1988, **17**, 967-1026.
16. J. Masanet, F. Caralp, L. Ley and R. Lesclaux, *Chem. Phys.*, 1992, **160**, 383-392.
17. C. P. Tsai and D. L. McFadden, *J. Phys. Chem.*, 1989, **93**, 2471-2474.
18. J. S. Francisco and Z. Li, *Chem. Phys. Lett.*, 1989, **162**, 528-534.
19. C. P. Tsai, S. M. Belanger, J. T. Kim, J. R. Lord and D. L. McFadden, *J. Phys. Chem.*, 1989, **93**, 1916-1922.
20. P. Pagsberg, J. T. Jodkowski, E. Ratajczak and A. Sillesen, *Chem. Phys. Lett.*, 1998, **286**, 138-144.
21. G. A. Skorobogatov, A. G. Rebrova and V. K. Khripun, *Kinet. Catal.*, 2010, **51**, 485-491.
22. K. L. Bierbrauer, M. S. Chiappero, F. E. Malanca and G. A. Argüello, *Journal of Photochemistry and Photobiology A: Chemistry*, 1999, **122**, 73-78.
23. A. Ainagos, *Kinet. Catal.*, 1991, **32**, 720-725.
24. B. Dils, J. Vertommen, S. Avondale Carl, L. Vereecken and J. Peeters, *PCCP*, 2005, **7**, 1187-1193.
25. M. J. Rossi, J. R. Barker and D. M. Golden, *J. Chem. Phys.*, 1979, **71**, 3722-3727.

26. M. Teitel'boim and V. Vedeneev, *Kinet. Catal.*, 1985, **26**.
27. V. Vedeneev, M. Y. Gol'denberg and M. Teitel'boim, *Kinet. Catal.*, 1987, **28**.
28. C. J. Cobos, A. E. Croce, K. Luther and J. Troe, *J. Phys. Chem. A*, 2010, **114**, 4755-4761.
29. N. L. Arthur and T. N. Bell, *Reviews of Chemical Intermediates*, 1978, **2**, 37-74.
30. T. N. Bell and K. O. Kutschke, *Can. J. Chem.*, 1964, **42**, 2713-2720.
31. S. P. Sander and R. Friedl, *Chemical kinetics and photochemical data for use in atmospheric studies: evaluation number 15*, 2006.
32. R. Atkinson, D. Baulch, R. Cox, J. Crowley, R. Hampson Jr, J. Kerr, M. Rossi and J. Troe, *Not in System*, 2001, 1-56.
33. J. S. Francisco, Z. Li and I. H. Williams, *Chem. Phys. Lett.*, 1987, **140**, 531-536.
34. L. Pasteris, E. V. Oexler and E. H. Staricco, *Int. J. Chem. Kinet.*, 1983, **15**, 835-844.
35. D. T. Clark and J. M. Tedder, *Trans. Faraday Society*, 1966, **62**, 399-404.
36. J. A. Kerr and D. M. Timlin, *Int. J. Chem. Kinet.*, 1971, **3**, 1-14.
37. H. Richter, J. Vandooren and P. J. Van Tiggelen, *Proc. Combust. Inst.*, 1994, **25**, 825-831.
38. D.-B. Cao, Y.-H. Ding, Y.-W. Li and H. Jiao, *Journal of Molecular Structure: THEOCHEM*, 2004, **674**, 177-183.
39. J. C. Biordi, C. P. Lazzara and J. F. Papp, *J. Phys. Chem.*, 1976, **80**, 1042-1048.
40. N. Butkovskaya, M. Larichev, I. Leipunskii, I. Morozov and V. Talroze, *Kinet. Catal*, 1980, **21**, 263-267.
41. Y. Yamamori, K. Takahashi and T. Inomata, *J. Phys. Chem. A*, 1999, **103**, 8803-8811.



42. N. K. Srinivasan, M. C. Su, J. V. Michael, A. W. Jasper, S. J. Klippenstein and L. B. Harding, *J. Phys. Chem. A*, 2008, **112**, 31-37.
43. C.-p. Tsai and D. L. McFadden, *Chem. Phys. Lett.*, 1990, **173**, 241-245.
44. W. J. R. Tyerman, *Trans. Faraday Society*, 1969, **65**, 1188-1198.
45. A. P. Modica, *J. Chem. Phys.*, 1967, **46**, 3663-3668.
46. J. Edelbüttel-Einhaus, K. Hoyer mann, G. Rohde, H. Gg. Wagner and W. Hack, *Berichte der Bunsengesellschaft für physikalische Chemie*, 1989, **93**, 1413-1416.
47. A. P. Modica and J. E. LaGraff, *J. Chem. Phys.*, 1965, **43**, 3383-3392.
48. I. C. Plumb and K. R. Ryan, *Plasma Chem. Plasma Process.*, 1986, **6**, 11-25.
49. S. H. Bauer, K. C. Hou and E. L. Resler, *Phys. Fluids*, 1969, **12**, I-125-I-132.
50. W. Hack, M. Wagner and K. Hoyer mann, *J. Phys. Chem.*, 1995, **99**, 10847-10852.
51. F. Battin-Leclerc, A. P. Smith, G. D. Hayman and T. P. Murrells, *J. Chem. Soc., Faraday Trans.*, 1996, **92**, 3305-3313.
52. H. Yu, E. M. Kennedy, M. A. Uddin, S. P. Sullivan and B. Z. Dlugogorski, *Environ. Sci. Technol.*, 2005, **39**, 3020-3028.
53. M. R. Zachariah, W. Tsang, P. R. Westmoreland and D. R. F. Burgess, *J. Phys. Chem.*, 1995, **99**, 12512-12519.
54. P. H. Wine and A. R. Ravishankara, *Chem. Phys. Lett.*, 1983, **96**, 129-132.
55. A. P. Modica, *J. Phys. Chem.*, 1970, **74**, 1194-1204.
56. R. C. Kennedy and J. B. Levy, *J. Phys. Chem.*, 1972, **76**, 3480-3488.
57. H. J. Gangloff, D. Milks, K. L. Maloney, T. N. Adams and R. A. Matula, *J. Chem. Phys.*, 1975, **63**, 4915-4926.
58. Y. Ninomiya, M. Goto, S. Hashimoto, M. Kawasaki and T. J. Wallington, *Int. J. Chem. Kinet.*, 2001, **33**, 130-135.

59. P. Behr and H. Heydtmann, *Berichte der Bunsengesellschaft für physikalische Chemie*, 1996, **100**, 553-561.
60. V. D. Knyazev, Á. Bencsura and I. R. Slagle, *J. Phys. Chem. A*, 1997, **101**, 849-852.
61. R. A. Brownsword, G. Hancock and D. E. Heard, *J. Chem. Soc., Faraday Trans.*, 1991, **87**, 2283-2289.
62. C. P. Tsai and D. L. McFadden, *J. Phys. Chem.*, 1990, **94**, 3298-3300.
63. J. L. Cookson, G. Hancock and K. G. McKendrick, *Berichte der Bunsengesellschaft für physikalische Chemie*, 1985, **89**, 335-336.
64. F. Castano and A. Ortiz de Zarate, *An. Quim.*, 1991, **87**, 167-173.
65. J. Van Hoeymissen, I. De Boelpaep, W. Uten and J. Peeters, *J. Phys. Chem.*, 1994, **98**, 3725-3731.
66. J. Peeters, J. Van Hoeymissen, S. Vanhaelemeersch and D. Vermeeylen, *J. Phys. Chem.*, 1992, **96**, 1257-1263.
67. B. Vettters, B. Dils, T. L. Nguyen, L. Vereecken, S. A. Carl and J. Peeters, *PCCP*, 2009, **11**, 4319-4325.
68. B. C. Garrett and D. G. Truhlar, *J. Am. Chem. Soc.*, 1979, **101**, 5207-5217.
69. J. T. Herron, *J. Phys. Chem. Ref. Data*, 1999, **28**, 1453-1483.
70. T. C. Clark, S. H. Garnett and G. B. Kistiakowsky, *J. Chem. Phys.*, 1969, **51**, 2885-2891.
71. L. I. Avramenko and V. M. Krasnen'kov, *Bulletin of the Academy of Sciences of the USSR, Division of chemical science*, 1966, **15**, 394-397.
72. A. Eremin, V. Ziborov, V. Shumova, D. Voiki and P. Roth, *Kinet. Catal.*, 1997, **38**, 1-7.
73. W. Tsang and R. F. Hampson, *J. Phys. Chem. Ref. Data*, 1986, **15**, 1087-1279.

74. W. M. Graven and F. J. Long, *J. Am. Chem. Soc.*, 1954, **76**, 2602-2607.
75. J. C. Tully, *J. Chem. Phys.*, 1975, **62**, 1893-1898.
76. T. J. Wallington, M. D. Hurley, J. Shi, M. M. Maricq, J. Sehested, O. J. Nielsen and T. Ellermann, *Int. J. Chem. Kinet.*, 1993, **25**, 651-665.
77. W.-C. Chen and R. A. Marcus, *J. Chem. Phys.*, 2006, **124**, 024306.
78. A. A. Turnipseed, S. B. Barone, N. R. Jensen, D. R. Hanson, C. J. Howard and A. R. Ravishankara, *J. Phys. Chem.*, 1995, **99**, 6000-6009.
79. H. Gaedtke, K. Glänzer, H. Hippler, K. Luther and J. Troe, *Proc. Combust. Inst.*, 1973, **14**, 295-303.
80. F. Louis, C. A. Gonzalez and J.-P. Sawerysyn, *J. Phys. Chem. A*, 2003, **107**, 9931-9936.
81. D. H. Stedman and H. Niki, *Environmental Letters*, 1973, **4**, 303-310.
82. G. Kapralova, S. Buben and A. Chaikin, *Kinet. Catal*, 1975, **16**, 508-511.
83. L. M. Arin and P. Warneck, *J. Phys. Chem.*, 1972, **76**, 1514-1516.
84. D. L. Baulch, C. J. Cobos, R. A. Cox, P. Frank, G. Hayman, T. Just, J. A. Kerr, T. Murrells, M. J. Pilling, J. Troe, R. W. Walker and J. Warnatz, *J. Phys. Chem. Ref. Data*, 1994, **23**, 847-848.
85. H. Freund and H. B. Palmer, *Int. J. Chem. Kinet.*, 1977, **9**, 887-905.
